# Supplementary material
Source: publisher site journal article supplement (https://www.dovepress.com/article/454505)
Supplement: Supplementary file 1 [file get_supplementary_file.php]

## Supplementary Figure 1

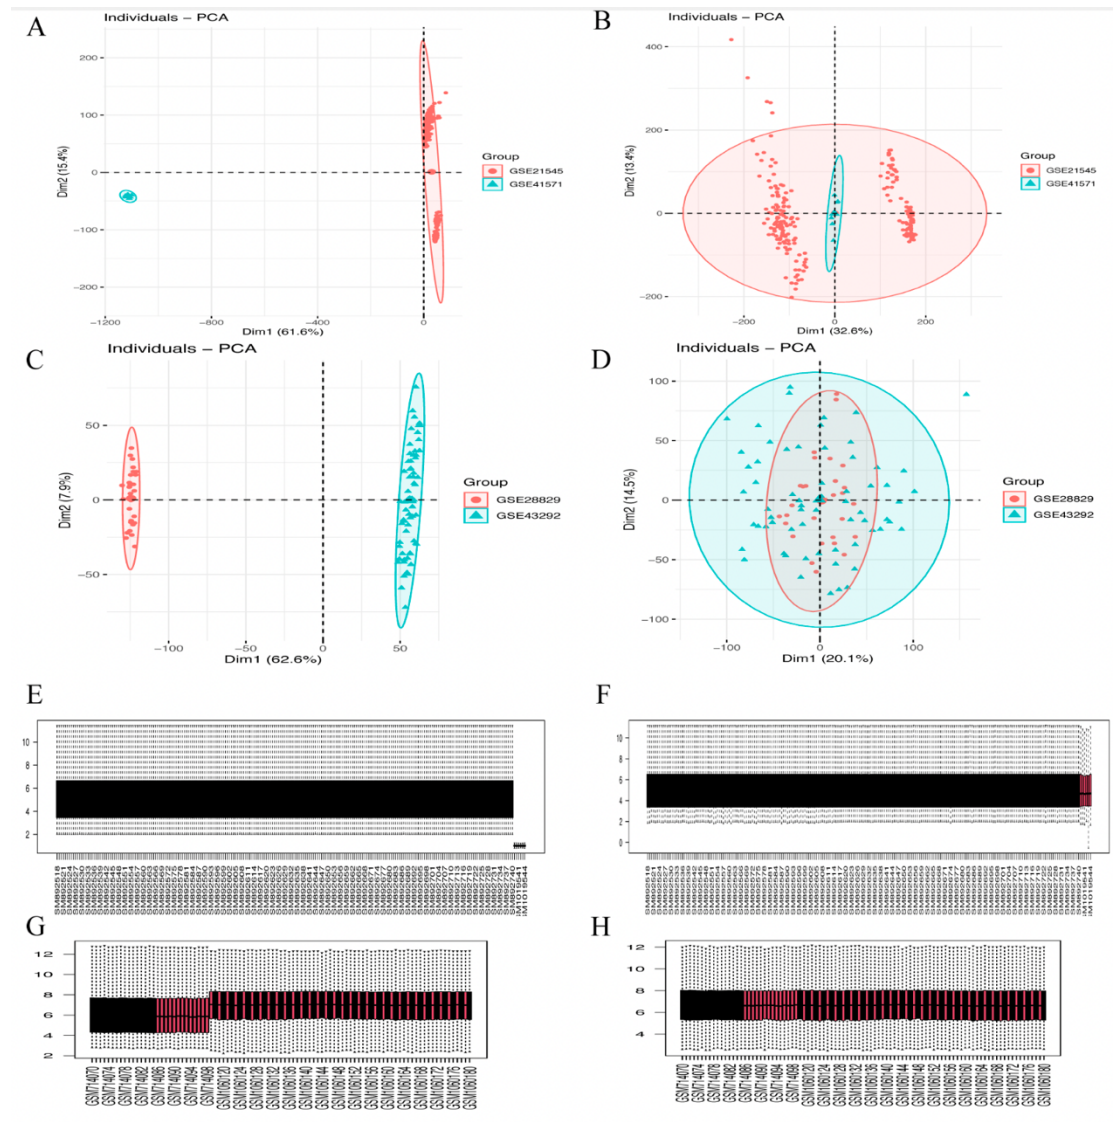

The merged matrix was standardized and processed. (A-B) The figure shows two-dimensional PCA cluster plots before and after correcting for inter-batch differences removed for GSE21545 and GSE41571. (C-D) The figure shows two-dimensional PCA cluster plots before and after correcting for inter-batch differences removed for GSE28829 and GSE43292. (E-F) The figure shows box plots before and after normalization for GSE21545 and GSE41571. (G-H) The figure shows box plots before and after normalization for GSE28829 and GSE43292.

## Supplementary Figure 2

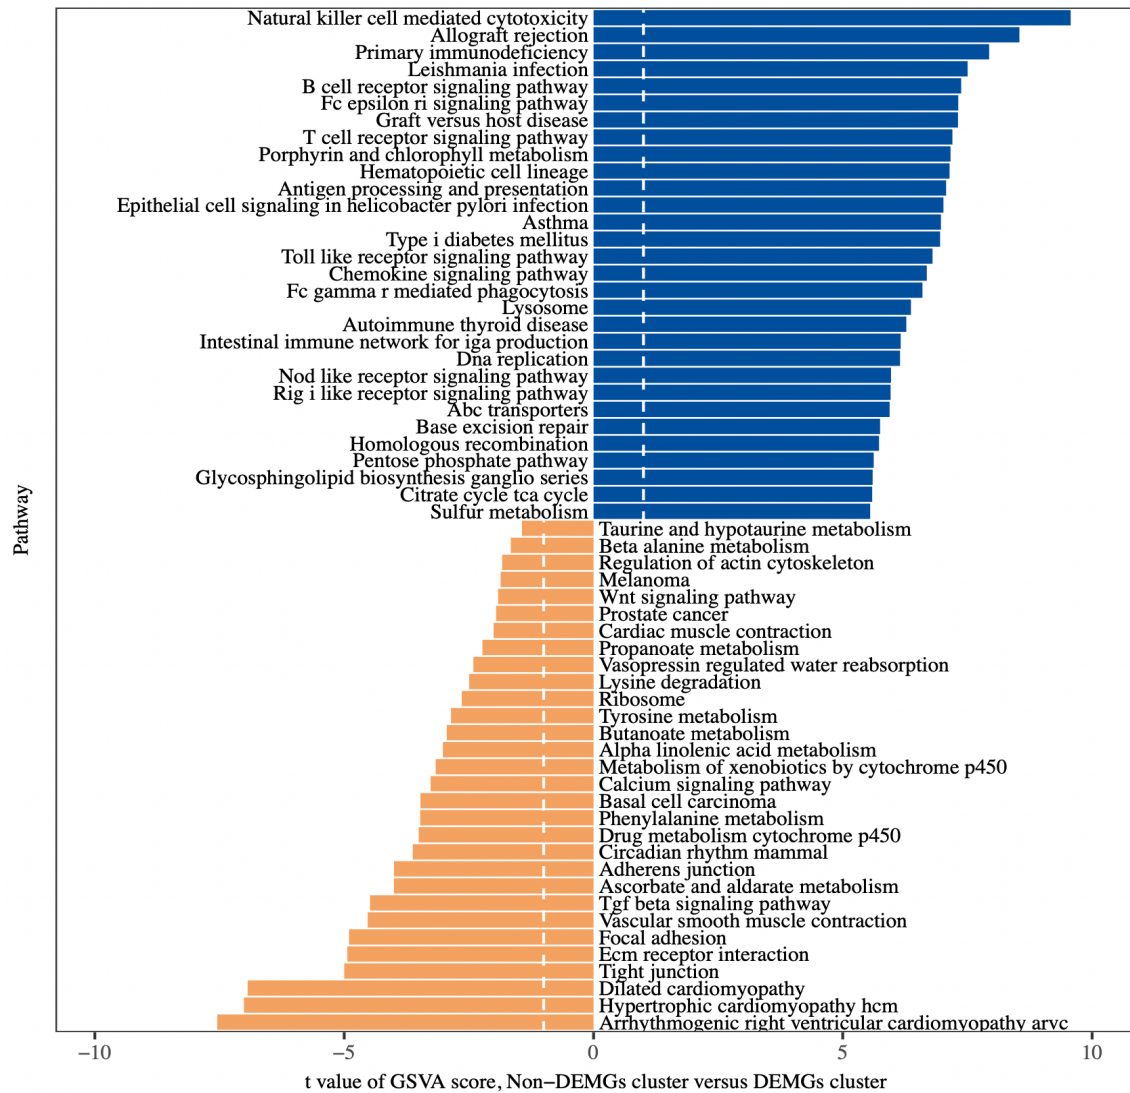

Top 30 KEGG pathways ranked by GSVA score differences between non-DEMGs cluster vs. DEMGs cluster.

### Supplementary Figure 3

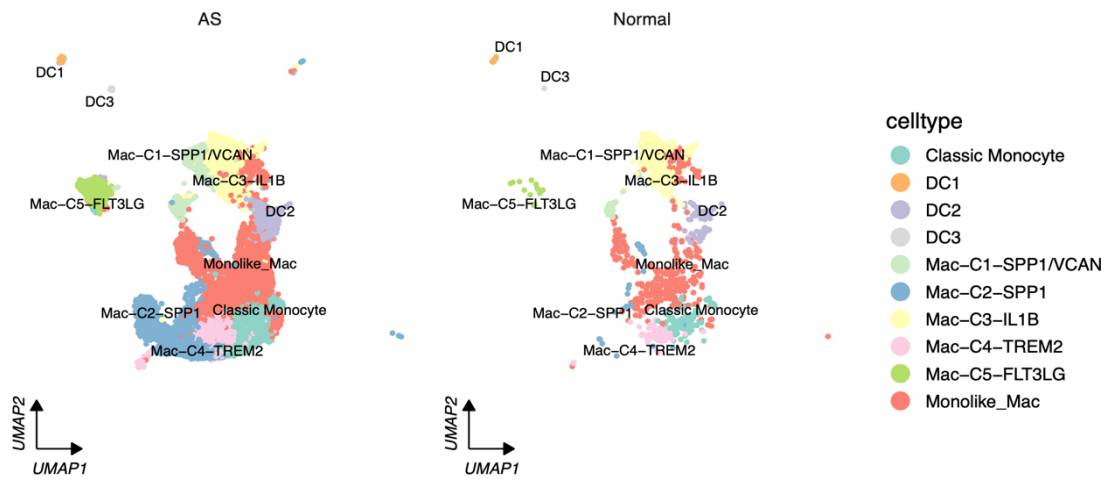

UMAP plot visualizing 10 myeloid subtypes identified from scRNA-seq in AS vs. normal groups.

## Supplementary Figure 4

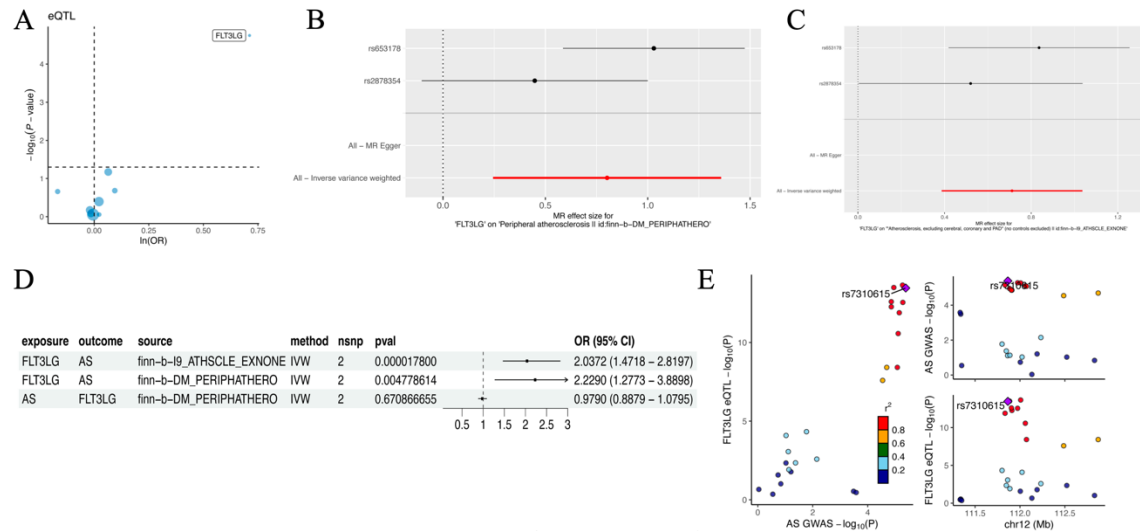

The MR analysis indicated a significant causal association between the eQTL of FLT3LG and AS. (A) Dot plot shows a significant causal association between the eQTL of FLT3LG and AS. (B-C) Forest plot of MR effect size FLT3LG on AS in different datasets, respectively. (D) Forest plot shows results of forward and reverse MR Analysis in AS. (E) Left: Scatter plot shows the relationship between the significance of eQTLs for the FLT3LG gene and the significance of GWAS. Each dot represents a single nucleotide polymorphism (SNP). The color coding (referenced in the legend as  $r^2$ ) indicates the degree of linkage disequilibrium (LD) between the SNPs, with warmer colors like red indicating higher LD. Right: Regional association plot in on a specific region of chromosome 12 (chr12), where the FLT3LG gene is located. It shows the  $-\log_{10}$  p-values of the association between SNPs in this region and the gene expression levels (eQTLs) and their association with AS.

## Supplementary Table 1

| GSEseries number | Data source           | Group                              | Type  | date    | patient | sample | platforms | manufacturer                                 |
|------------------|-----------------------|------------------------------------|-------|---------|---------|--------|-----------|----------------------------------------------|
| GSE159677        | Carotid artery plaque | 3AS:3non-AS                        | scRNA | 10/2020 | 3       | 6      | GPL18573  | Illumina NextSeq 500 (Homo sapiens)          |
| GSE155512        | Carotid artery plaque | 1AS:2non-AS                        | scRNA | 08/2020 | 3       | 3      | GPL24676  | Illumina NovaSeq 6000 (Homo sapiens)         |
| GSE43292         | Carotid artery plaque | 32AS:32non-AS                      | bulk  | 04/2013 | 32      | 64     | GPL6244   | Affymetrix Human Gene 1.0 ST Array           |
| GSE28829         | Carotid artery plaque | 13EAS:16AAS                        | bulk  | 04/2011 | 29      | 29     | GPL570    | Affymetrix Human Genome U133 Plus 2.0 Array  |
| GSE21545         | Carotid artery plaque | 126AS (carotid plaque):97AS (PBMC) | bulk  | 03/2012 | 223     | 126    | GPL570    | Affymetrix Human Genome U133 Plus 2.0 Array  |
| GSE163154        | Carotid artery plaque | 16EAS:27AAS                        | bulk  | 12/2020 | 43      | 43     | GPL6104   | Illumina humanRef-8 v2.0 expression beadchip |
| GSE41571         | Carotid artery plaque | 6EAS:5AAS                          | bulk  | 12/2012 | 11      | 11     | GPL570    | Affymetrix Human Genome U133 Plus 2.0 Array  |

EAS, early atherosclerotic plaque; AAS, advanced atherosclerotic plaque

The source of the datasets.

## Supplementary Table 2

| Items                                                        | Identification of Hub Genes in AS Based on Bioinformatics Analysis                                               |                                                      |                                      |
|--------------------------------------------------------------|------------------------------------------------------------------------------------------------------------------|------------------------------------------------------|--------------------------------------|
|                                                              | Our Findings                                                                                                     | Cell Paper (PMID:36855107)                           | Cell Paper (PMID:36061826)           |
| Years                                                        | 2024                                                                                                             | 2023                                                 | 2022                                 |
| Atherosclerotic plaque subtypes with prognostic significance | cluster3 AS plaques                                                                                              | -                                                    | -                                    |
| A subtype of macrophage with prognostic significance         | SPP1 <sup>+</sup> /VCAN <sup>+</sup> macrophages, IL1B <sup>+</sup> macrophages, FLT3LG <sup>+</sup> macrophages | SPP1 <sup>+</sup> macrophages                        | -                                    |
| Single cell analysis strategies                              | Monocle2, PySCENIC, scMetabolism, CellChart, BayesPrism                                                          | Monocle2, SCENIC, scMetabolism, NicheNet, CIBERSORTX | -                                    |
| Mendelian Randomization (MR) analysis                        | use                                                                                                              | -                                                    | -                                    |
| Machine learning algorithms                                  | 10 algorithms                                                                                                    | -                                                    | 3 algorithms                         |
| Bulk datasets use                                            | GSE21545, GSE41571, GSE163154, GSE28829, GSE43292                                                                | GSE21545, GSE100927, GSE163154, GSE43292             | GSE28829, GSE43292, GSE100927        |
| Verification                                                 | Mice Atherosclerotic plaque: qPCR, WB, mIF                                                                       | -                                                    | Mice Atherosclerotic plaque: WB, mIF |

qPCR, quantitative real-time polymerase chain reaction; WB, western blot; mIF, multiplex immunofluorescence

Several findings in this study are significantly novel in comparing to what is published.
